# Supplementary material for: The Potential microRNA Prognostic Signature in HNSCCs: A Systematic Review
Source: MDPI journal article supplement (doi:10.3390/ncrna9050054), 2023-09-14
Supplement: s1 [file s1]

"cutoff value" "p value"

|                  |                   |
|------------------|-------------------|
| 82073.6666666667 | 0.496654205496861 |
| 82822.3333333333 | 0.445460420584792 |
| 82874.3333333333 | 0.378114067718528 |
| 82952.6666666667 | 0.45405933041629  |
| 83220.3333333333 | 0.425266760027564 |
| 83281.3333333333 | 0.360350231042263 |
| 83360            | 0.417368740121821 |
| 83368.6666666667 | 0.353602045039084 |
| 83495.6666666667 | 0.324340749736866 |
| 83712.6666666667 | 0.294633296954918 |
| 84137.6666666667 | 0.253130080753877 |
| 84139            | 0.324714307959599 |
| 84360.3333333333 | 0.355150373732316 |
| 84456.6666666667 | 0.33110449034668  |
| 84544.3333333333 | 0.287698805743932 |
| 84601            | 0.336394119524748 |
| 85103.6666666667 | 0.31532979493815  |
| 85245.6666666667 | 0.314769124038461 |
| 85257            | 0.282019242697475 |
| 85420.6666666667 | 0.344622267801741 |
| 85475.6666666667 | 0.423476900479705 |
| 85746.6666666667 | 0.38321285017273  |
| 85855.6666666667 | 0.344706798883582 |
| 86063.6666666667 | 0.326000121171092 |
| 86487.3333333333 | 0.403011721689044 |
| 86558            | 0.384979075297523 |
| 86577            | 0.334371355553705 |
| 86782.6666666667 | 0.333939270755168 |
| 86862.3333333333 | 0.287222772342023 |
| 86940.3333333333 | 0.250354861625512 |
| 87077            | 0.226166214576547 |
| 87254.6666666667 | 0.203763286719611 |
| 87284.6666666667 | 0.200750444291658 |
| 87684            | 0.173697221136127 |
| 87756.3333333333 | 0.166807326535295 |
| 87765.6666666667 | 0.198547790199506 |
| 87946.3333333333 | 0.169566918844272 |
| 88095            | 0.216606400196792 |
| 88630.6666666667 | 0.178520062845605 |
| 88993.3333333333 | 0.222637827019641 |
| 89051.6666666667 | 0.20251335395389  |
| 89069            | 0.219430615376442 |
| 89216.3333333333 | 0.214450197534526 |
| 89297.6666666667 | 0.192782106012711 |
| 89401.6666666667 | 0.241577132792289 |
| 89458.3333333333 | 0.219694460058572 |
| 89495            | 0.247431089926002 |
| 89563.6666666667 | 0.308239043888176 |
| 89631            | 0.277728284087636 |
| 89793.3333333333 | 0.232353261399607 |
| 89810.3333333333 | 0.192670466898962 |
| 89828.3333333333 | 0.170960978606887 |
| 89953            | 0.204763265716614 |
| 90002            | 0.260930405824504 |
| 90064.3333333333 | 0.260103583832532 |
| 90264.3333333333 | 0.220667015582418 |
| 90365            | 0.200811443709181 |
| 90505.3333333333 | 0.245586675407976 |
| 90648            | 0.283869736007025 |
| 91378            | 0.238177456866502 |
| 91457.3333333333 | 0.216223134863292 |
| 91701.3333333333 | 0.185076883602379 |

91977.3333333333 0.157004832054077  
92299 0.141658892069749  
92414 0.152617487474037  
92753.3333333333 0.13393817801869  
93467.6666666667 0.10849418606676  
93986.3333333333 0.132384729331164  
94070.3333333333 0.11782474886568  
94246 0.09975796704861  
94267 0.128746428150628  
94571.6666666667 0.115579664307538  
94812.6666666667 0.14085261244206  
94947.6666666667 0.137957261485906  
95082 0.114601330668906  
95351 0.150194212555171  
95361.6666666667 0.193838995498738  
95529.3333333333 0.228635779327385  
95531.6666666667 0.208179945931881  
95533.6666666667 0.172368872925764  
95621.3333333333 0.141433466387337  
95776 0.170333721575741  
95915.6666666667 0.157559780757176  
95983 0.200005344349327  
96037 0.171918407129354  
96199.3333333333 0.209793808615438  
96284.6666666667 0.189736724113236  
96361.3333333333 0.241895504736853  
96719.6666666667 0.221254633983208  
96935.3333333333 0.277548762215259  
97227 0.246552679096391  
97245 0.206041387030199  
97442.6666666667 0.243562054576845  
97558 0.226423182849142  
97600.6666666667 0.282944323130399  
97682.3333333333 0.238201269351344  
97741 0.208055923224599  
98147 0.237344500224883  
98226 0.198012941557556  
98283 0.24513263342983  
98323.6666666667 0.212051362469077  
98405.3333333333 0.248464801453379  
98874 0.285606436526541  
98894 0.312858454816094  
98907 0.282147156559399  
99189 0.24434935982904  
99289 0.243026210236394  
99510.3333333333 0.208504985090427  
99938 0.256161086320321  
100059 0.304682118013417  
100156 0.358514214667188  
100239.3333333333 0.412714312528936  
100775.3333333333 0.497151907931204  
100813.6666666667 0.585744816006324  
100995.3333333333 0.560925481654699  
101025.3333333333 0.519331069830723  
101041 0.472722781305634  
101189.3333333333 0.432813074040132  
101380 0.407989488919667  
101478 0.377873065548467  
101794 0.358513598419019  
102000.6666666667 0.353361718859145  
102215.6666666667 0.416162954894885  
102296 0.366299333835124  
102619.3333333333 0.435495036481021

102638.333333333 0.395285236880308  
102778.333333333 0.362671623419761  
102793.666666667 0.327620386196036  
102806.666666667 0.397510640694224  
102909.666666667 0.383371303387617  
102971 0.452283483136859  
103353 0.399781510894728  
103606.666666667 0.349143666077007  
103616.666666667 0.420775473589487  
103863.666666667 0.471952101800986  
104061.666666667 0.409325536612397  
104067.666666667 0.365033758213853  
104111.333333333 0.409518110146294  
104715 0.463251742468114  
104730 0.533610133434397  
104743.333333333 0.505340641873547  
105123.666666667 0.598225414815081  
105256.666666667 0.672542071261035  
105343.333333333 0.610995838986279  
105364 0.538798477458697  
105512 0.592746932193807  
105631 0.552478773418999  
105878.666666667 0.532333214929308  
106077.333333333 0.519508774738249  
106367 0.481833373443169  
107017.666666667 0.566670350301034  
107169 0.506822846879274  
107187 0.585661513252238  
107459.333333333 0.514776121411736  
107570.666666667 0.601163972028515  
107797.333333333 0.685468140786444  
107800 0.609103914741385  
107867 0.685005155861379  
108147.333333333 0.773217944895772  
108182.666666667 0.712742453938194  
108349 0.708593407952683  
108356 0.682938522189409  
108405.666666667 0.606520818903413  
108470.666666667 0.661077658102957  
108563 0.691856141072448  
108765.666666667 0.662525957719299  
108951.666666667 0.716913215346899  
108952 0.792798530567679  
109388.666666667 0.836660507804377  
109543.333333333 0.786300245875621  
109913 0.705281441234706  
109938.666666667 0.765326202887843  
110031.333333333 0.724740075139377  
110082 0.830707299904276  
110089.666666667 0.897864459281423  
110230.666666667 0.875930535509963  
110300.666666667 0.792190953548653  
110305.666666667 0.882595907128124  
110321 0.798577156878292  
110550 0.728344169356536  
110578.333333333 0.693539932263235  
110764.666666667 0.737917287441783  
111106 0.835110112133172  
111444 0.944626727551792  
112253.666666667 0.859213981417644  
112413 0.940952649544125  
112459 0.896794848100413  
112768.333333333 0.967133285422885

112896.666666667 0.921008505838007  
113792.333333333 0.835514519087366  
113859 0.771370883878797  
114128.666666667 0.800496301068729  
114261.333333333 0.848292547477617  
114321 0.831427496706414  
114393 0.793269186637818  
114614.333333333 0.722017973317685  
115162.666666667 0.665483096738923  
115218.333333333 0.758548223423822  
115282 0.858205432014289  
115348.333333333 0.786451760349102  
116057.333333333 0.728051501622102  
116073.666666667 0.671017641222478  
116115 0.758192847457461  
116270.666666667 0.843948031397689  
116302.666666667 0.838022299445479  
116449.333333333 0.82699392899486  
116521 0.823413261142148  
116980.666666667 0.925731750631438  
116982.666666667 0.846288202687814  
117031.666666667 0.94581348979929  
117095.666666667 0.903113471883069  
117126.666666667 0.815964214683247  
117294 0.730602232886897  
117394.333333333 0.718881342594387  
117520.333333333 0.811409177870082  
117640.666666667 0.889390360556729  
117703 0.801846409904295  
117958.333333333 0.733323003279805  
118133.666666667 0.683422789439223  
118153.666666667 0.736423294341575  
118206.666666667 0.716117855187162  
118524.333333333 0.670404109601698  
118723.666666667 0.619206224260402  
118784.666666667 0.574102103013038  
119261.666666667 0.64199214981937  
119387 0.599993743683846  
119391.666666667 0.686056925392924  
119565 0.640641764803715  
119676.333333333 0.705430647394724  
119798 0.76380291836358  
119843 0.725823168091973  
119932.333333333 0.686925018479579  
120048.333333333 0.746270400403886  
120114.666666667 0.706868555536005  
120324.666666667 0.62258423583202  
120341 0.542404159218076  
120465.333333333 0.611243302403834  
120625.333333333 0.696161785395879  
120881 0.663276773335745  
120983.333333333 0.658829842067599  
121235 0.731507971979767  
121437.666666667 0.644957593378811  
121598.333333333 0.562319306128389  
121670.666666667 0.552085071790353  
121693.666666667 0.501453072574565  
122029.666666667 0.566621754801901  
122131.666666667 0.646645061150615  
122164.666666667 0.737690930785076  
122325.666666667 0.849702538918978  
122396.333333333 0.963054659041054  
122431.666666667 0.890338030534088

122515.666666667 0.797090863135993  
122597 0.717348907093546  
122609.666666667 0.666523604437763  
122761 0.755771425392282  
123343.666666667 0.693913853450651  
123460 0.77945813509787  
123896.333333333 0.878559792785113  
123898.333333333 0.952635609522836  
123995 0.984091297027934  
123998.666666667 0.91916398770604  
124719.333333333 0.857803246034558  
124960 0.852501748710581
